# Supplementary material
Source: Springer Nature journal article supplement (https://www.springermedizin.de/resource/supplementary/12943_2012_1147_MOESM7_ESM.pdf/9552602)
Supplement: MOESM7 [file 9552602]

# Lyn Activation of ErbB1/ErbB3/c-Myc Complexes in Plasma Membranes

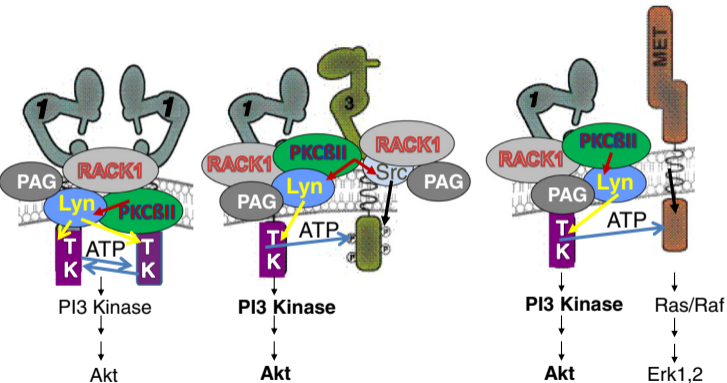

I. ErbB1 homodimers

II. ErbB1/ErbB3 heterodimers

III. ErbB1/c-Met heterodimers
